# Supplementary material for: Genomic Epidemiology of C2/H30Rx and C1-M27 Subclades of Escherichia coli ST131 Isolates from Clinical Blood Samples in Hungary
Source: MDPI journal article supplement (doi:10.3390/antibiotics13040363), 2024-04-16
Supplement: s1 [file s1]

## Supplementary Materials

**The thirty isolates selected for MiniON sequencing are the followings:**

C2/H30Rx: EC1, EC2, EC3, EC7, EC10, EC15, EC16, EC18, EC19, EC22, EC24, EC25, K3, K4, K5, K6, K7, K8, K10

C1-M27: EC4, EC5, EC26, EC28, EC29, EC33, EC34, EC36, EC38, EC39, K9

**Table S1.** Thirty C2/H30Rx and thirty-three C1-M27 ESBL-producing *E. coli* ST131 were used in the study, including the source, ST131 sublineage, collection date, sex and age.

| Number | Isolate | Health care Institution | City of Isolation | ST131 Sublineage | Collection Date | Sex    | Age |
|--------|---------|-------------------------|-------------------|------------------|-----------------|--------|-----|
| 1      | AN10    | 1                       | Esztergom         | C1-M27           | Aug 29, 2016    | female | 52  |
| 2      | AN12    | 2                       | Pécs              | C1-M27           | Feb 28, 2017    | male   | 54  |
| 3      | AN13    | 3                       | Budapest          | C1-M27           | May 17, 2017    | female | 59  |
| 4      | AN14    | 4                       | Kaposvár          | C1-M27           | Apr 23, 2017    | male   | 78  |
| 5      | AN15    | 5                       | Salgótarján       | C1-M27           | May 07, 2017    | male   | 86  |
| 6      | AN16    | 6                       | Szentes           | C1-M27           | Sep 19, 2017    | female | 75  |
| 7      | AN17    | 7                       | Eger              | C1-M27           | Jun 24, 2018    | male   | 87  |
| 8      | AN18    | 8                       | Miskolc           | C1-M27           | Oct 26, 2018    | female | 91  |
| 9      | AN3     | 11                      | Kecskemét         | C1-M27           | Apr 08, 2016    | female | 68  |
| 10     | EC1     | 12                      | Budapest          | C2/H30Rx         | Oct 13, 2018    | female | 63  |
| 11     | EC2     | 12                      | Budapest          | C2/H30Rx         | Oct 16, 2018    | male   | 83  |
| 12     | EC3     | 12                      | Budapest          | C2/H30Rx         | Oct 30, 2018    | male   | 77  |
| 13     | EC4     | 12                      | Budapest          | C1-M27           | Oct 12, 2018    | male   | 38  |
| 14     | EC5     | 12                      | Budapest          | C1-M27           | Oct 24, 2018    | female | 58  |
| 15     | EC7     | 8                       | Miskolc           | C2/H30Rx         | Feb 25, 2021    | female | 67  |
| 16     | EC9     | 10                      | Miskolc           | C2/H30Rx         | Oct 19, 2021    | male   | 66  |
| 17     | EC10    | 15                      | Debrecen          | C2/H30Rx         | Apr 11, 2021    | female | 46  |
| 18     | EC11    | 15                      | Debrecen          | C2/H30Rx         | Oct 05, 2021    | male   | 86  |
| 19     | EC12    | 3                       | Budapest          | C2/H30Rx         | Jul 10, 2021    | female | 44  |
| 20     | EC13    | 12                      | Budapest          | C2/H30Rx         | Jul 14, 2021    | female | 87  |
| 21     | EC14    | 13                      | Budapest          | C2/H30Rx         | Mar 26, 2021    | female | 92  |

|    |      |    |               |          |              |        |    |
|----|------|----|---------------|----------|--------------|--------|----|
| 22 | EC15 | 13 | Budapest      | C2/H30Rx | Nov 27, 2021 | male   | 49 |
| 23 | EC16 | 14 | Kistarcsa     | C2/H30Rx | Oct 03, 2021 | male   | 78 |
| 24 | EC17 | 14 | Kistarcsa     | C2/H30Rx | Dec 12, 2021 | male   | 64 |
| 25 | EC18 | 4  | Kaposvár      | C2/H30Rx | Jul 31, 2021 | male   | 71 |
| 26 | EC19 | 5  | Salgótarján   | C2/H30Rx | Jun 27, 2021 | male   | 77 |
| 27 | EC20 | 7  | Eger          | C2/H30Rx | Feb 06, 2021 | male   | 75 |
| 28 | EC21 | 7  | Eger          | C2/H30Rx | May 06, 2021 | female | 62 |
| 29 | EC22 | 2  | Pécs          | C2/H30Rx | Apr 21, 2021 | male   | 70 |
| 30 | EC23 | 18 | Sopron        | C2/H30Rx | Sep 22, 2021 | female | 52 |
| 31 | EC24 | 1  | Esztergom     | C2/H30Rx | Dec 09, 2021 | male   | 72 |
| 32 | EC25 | 1  | Esztergom     | C2/H30Rx | Sep 10, 2021 | female | 89 |
| 33 | EC26 | 10 | Miskolc       | C1-M27   | Oct 21, 2021 | female | 80 |
| 34 | EC27 | 15 | Debrecen      | C1-M27   | Jan 14, 2021 | male   | 64 |
| 35 | EC28 | 3  | Budapest      | C1-M27   | Apr 10, 2021 | female | 95 |
| 36 | EC29 | 3  | Budapest      | C1-M27   | Oct 21, 2021 | female | 91 |
| 37 | EC30 | 12 | Budapest      | C1-M27   | Apr 20, 2021 | male   | 74 |
| 38 | EC31 | 13 | Budapest      | C1-M27   | Jul 23, 2021 | male   | 70 |
| 39 | EC32 | 16 | Kecskemét     | C1-M27   | Jul 07, 2021 | male   | 76 |
| 40 | EC33 | 16 | Kecskemét     | C1-M27   | Jun 03, 2021 | male   | 74 |
| 41 | EC34 | 21 | Nyíregyháza   | C1-M27   | Aug 15, 2021 | male   | 64 |
| 42 | EC35 | 21 | Nyíregyháza   | C1-M27   | Jun 16, 2021 | female | 81 |
| 43 | EC36 | 4  | Kaposvár      | C1-M27   | May 01, 2021 | male   | 20 |
| 44 | EC37 | 9  | Salgótarján   | C1-M27   | Mar 11, 2021 | female | 60 |
| 45 | EC38 | 2  | Pécs          | C1-M27   | Jan 07, 2021 | female | 72 |
| 46 | EC39 | 2  | Pécs          | C1-M27   | Apr 27, 2021 | male   | 0  |
| 47 | EC40 | 2  | Pécs          | C1-M27   | Sep 09, 2021 | male   | 80 |
| 48 | EC41 | 18 | Sopron        | C1-M27   | Aug 27, 2021 | male   | 67 |
| 49 | K3   | 18 | Sopron        | C2/H30Rx | Aug 23, 2015 | male   | 85 |
| 50 | K4   | 4  | Kaposvár      | C2/H30Rx | Dec 18, 2015 | male   | 66 |
| 51 | K5   | 19 | Kazincbarcika | C2/H30Rx | Apr 19, 2016 | male   | 50 |
| 52 | K6   | 2  | Pécs          | C2/H30Rx | May 19, 2016 | female | 59 |
| 53 | K7   | 20 | Szolnok       | C2/H30Rx | Feb 28, 2017 | female | 64 |
| 54 | K8   | 8  | Miskolc       | C2/H30Rx | Feb 09, 2017 | female | 68 |
| 55 | K9   | 1  | Esztergom     | C1-M27   | Sep 18, 2017 | male   | 78 |
| 56 | K10  | 4  | Kaposvár      | C2/H30Rx | Dec 25, 2017 | female | 91 |
| 57 | K11  | 10 | Miskolc       | C2/H30Rx | Jun 24, 2018 | male   | 70 |

|    |     |    |           |          |                 |      |    |
|----|-----|----|-----------|----------|-----------------|------|----|
| 58 | K12 | 3  | Budapest  | C2/H30Rx | Nov 05,<br>2018 | male | 86 |
| 59 | K16 | 3  | Budapest  | C1-M27   | Jul 07, 2015    | male | 82 |
| 60 | K17 | 3  | Budapest  | C1-M27   | Apr 18, 2015    | male | 74 |
| 61 | K18 | 9  | Vác       | C1-M27   | Sep 08, 2015    | male | 73 |
| 62 | K19 | 14 | Kistarcsa | C1-M27   | Mar 24, 2017    | male | 58 |
| 63 | K20 | 11 | Kecskemét | C1-M27   | Aug 16,<br>2017 | male | 72 |

**Table S2.** The genomic quality indicators for sequencing of the 63 ESBL-producing *E. coli* ST131

| Isolate | Average Coverage (Assembled) | Length (Assembled) | N50    | Contig Count (Assembled) | GC-Content (Assembled) | Assembly Base Count | Approximate Genome Size (Mbases) | Avg. Contig Length (Assembled) |
|---------|------------------------------|--------------------|--------|--------------------------|------------------------|---------------------|----------------------------------|--------------------------------|
| AN10    | 52                           | 5100310            | 192059 | 108                      | 50.7                   | 5102603             | 5.1                              | 47246                          |
| AN12    | 162                          | 5091666            | 241485 | 95                       | 50.74                  | 5092650             | 5.1                              | 53606                          |
| AN13    | 158                          | 5086337            | 222583 | 98                       | 50.73                  | 5088098             | 5.1                              | 51919                          |
| AN14    | 103                          | 5118088            | 222568 | 111                      | 50.63                  | 5121005             | 5.1                              | 46135                          |
| AN15    | 79                           | 5068428            | 222567 | 104                      | 50.73                  | 5070486             | 5.1                              | 48754                          |
| AN16    | 93                           | 5051891            | 222568 | 141                      | 50.74                  | 5054074             | 5.1                              | 35844                          |
| AN17    | 224                          | 5263647            | 174043 | 172                      | 50.72                  | 5269929             | 5.3                              | 30639                          |
| AN18    | 76                           | 5124846            | 209775 | 108                      | 50.69                  | 5127450             | 5.1                              | 47476                          |
| AN3     | 97                           | 5127402            | 230034 | 101                      | 50.75                  | 5129275             | 5.1                              | 50784                          |
| EC1     | 102                          | 5321807            | 209574 | 163                      | 50.75                  | 5325715             | 5.3                              | 32673                          |
| EC2     | 98                           | 5307214            | 217637 | 128                      | 50.73                  | 5309255             | 5.3                              | 41478                          |
| EC3     | 77                           | 5302430            | 217637 | 142                      | 50.78                  | 5303689             | 5.3                              | 37349                          |
| EC4     | 104                          | 5042280            | 334258 | 91                       | 50.76                  | 5044297             | 5.0                              | 55431                          |
| EC5     | 110                          | 5071469            | 209000 | 94                       | 50.71                  | 5072071             | 5.1                              | 53958                          |
| EC7     | 96                           | 5285885            | 209434 | 161                      | 50.76                  | 5289394             | 5.3                              | 32853                          |
| EC9     | 111                          | 5372281            | 178598 | 141                      | 50.59                  | 5374259             | 5.4                              | 38115                          |
| EC10    | 104                          | 5412460            | 188604 | 133                      | 50.63                  | 5415014             | 5.4                              | 40714                          |
| EC11    | 119                          | 5322663            | 205891 | 143                      | 50.69                  | 5324680             | 5.3                              | 37235                          |
| EC12    | 118                          | 5391808            | 208914 | 134                      | 50.71                  | 5394177             | 5.4                              | 40255                          |
| EC13    | 111                          | 5296905            | 190448 | 150                      | 50.74                  | 5299437             | 5.3                              | 35329                          |
| EC14    | 117                          | 5201436            | 185632 | 119                      | 50.72                  | 5203294             | 5.2                              | 43725                          |
| EC15    | 93                           | 5171236            | 375675 | 116                      | 50.67                  | 5173684             | 5.2                              | 44600                          |
| EC16    | 100                          | 5354612            | 244894 | 135                      | 50.72                  | 5357210             | 5.4                              | 39683                          |
| EC17    | 92                           | 5330428            | 222425 | 123                      | 50.68                  | 5332573             | 5.3                              | 43354                          |
| EC18    | 129                          | 5330645            | 211292 | 142                      | 50.66                  | 5333255             | 5.3                              | 37558                          |
| EC19    | 122                          | 5281740            | 227913 | 113                      | 50.63                  | 5285081             | 5.3                              | 46770                          |
| EC20    | 117                          | 5415385            | 191062 | 139                      | 50.59                  | 5418007             | 5.4                              | 38978                          |
| EC21    | 136                          | 5236652            | 208561 | 139                      | 50.67                  | 5238763             | 5.2                              | 37688                          |
| EC22    | 106                          | 5232131            | 178138 | 113                      | 50.54                  | 5234025             | 5.2                              | 46318                          |
| EC23    | 112                          | 5228388            | 303673 | 102                      | 50.73                  | 5230137             | 5.2                              | 51275                          |
| EC24    | 108                          | 5353169            | 183048 | 139                      | 50.7                   | 5356682             | 5.4                              | 38537                          |
| EC25    | 128                          | 5373045            | 187963 | 141                      | 50.66                  | 5375894             | 5.4                              | 38126                          |
| EC26    | 107                          | 5126382            | 209304 | 128                      | 50.77                  | 5129318             | 5.1                              | 40072                          |

|      |     |         |        |     |       |         |     |       |
|------|-----|---------|--------|-----|-------|---------|-----|-------|
| EC27 | 113 | 5105730 | 217443 | 126 | 50.73 | 5108654 | 5.1 | 40544 |
| EC28 | 123 | 5225969 | 222525 | 124 | 50.84 | 5229044 | 5.2 | 42169 |
| EC29 | 157 | 5124527 | 222604 | 135 | 50.75 | 5127665 | 5.1 | 37982 |
| EC30 | 138 | 5066166 | 209103 | 100 | 50.69 | 5068660 | 5.1 | 50686 |
| EC31 | 120 | 5080630 | 227816 | 99  | 50.63 | 5082398 | 5.1 | 51337 |
| EC32 | 109 | 5062971 | 216752 | 99  | 50.77 | 5065269 | 5.1 | 51164 |
| EC33 | 66  | 5112246 | 209517 | 107 | 50.72 | 5115021 | 5.1 | 47803 |
| EC34 | 124 | 5067023 | 139115 | 118 | 50.72 | 5069750 | 5.1 | 42963 |
| EC35 | 131 | 5130156 | 222583 | 122 | 50.74 | 5132354 | 5.1 | 42068 |
| EC36 | 136 | 5073026 | 216213 | 103 | 50.75 | 5074957 | 5.1 | 49271 |
| EC37 | 156 | 5194576 | 191062 | 134 | 50.64 | 5196419 | 5.2 | 38779 |
| EC38 | 103 | 5183088 | 222525 | 126 | 50.69 | 5185330 | 5.2 | 41153 |
| EC39 | 155 | 5029882 | 222436 | 99  | 50.77 | 5033399 | 5.0 | 50842 |
| EC40 | 154 | 5091402 | 216129 | 127 | 50.73 | 5095568 | 5.1 | 40122 |
| EC41 | 132 | 5160021 | 249550 | 130 | 50.75 | 5164137 | 5.2 | 39724 |
| K3   | 134 | 5253038 | 258335 | 156 | 50.74 | 5257504 | 5.3 | 33701 |
| K4   | 116 | 5378258 | 222570 | 135 | 50.67 | 5379827 | 5.4 | 39850 |
| K5   | 122 | 5167652 | 282373 | 135 | 50.75 | 5171665 | 5.2 | 38308 |
| K6   | 105 | 5451821 | 170814 | 209 | 50.73 | 5457074 | 5.5 | 26110 |
| K7   | 141 | 5342460 | 209516 | 158 | 50.84 | 5345802 | 5.3 | 33834 |
| K8   | 100 | 5425918 | 188563 | 156 | 50.65 | 5428631 | 5.4 | 34798 |
| K9   | 98  | 5175699 | 216213 | 102 | 50.63 | 5176766 | 5.2 | 50752 |
| K10  | 132 | 5313776 | 172776 | 158 | 50.71 | 5316493 | 5.3 | 33648 |
| K11  | 117 | 5412730 | 190448 | 160 | 50.59 | 5416664 | 5.4 | 33854 |
| K12  | 117 | 5307291 | 192201 | 157 | 50.73 | 5310814 | 5.3 | 33826 |
| K16  | 94  | 5109157 | 241468 | 86  | 50.75 | 5110155 | 5.1 | 59420 |
| K17  | 97  | 5184632 | 209000 | 111 | 50.71 | 5186313 | 5.2 | 46723 |
| K18  | 101 | 5007092 | 255223 | 89  | 50.74 | 5008246 | 5.0 | 56272 |
| K19  | 96  | 5287332 | 216213 | 128 | 50.74 | 5288974 | 5.3 | 41320 |
| K20  | 86  | 5104267 | 199234 | 120 | 50.74 | 5106747 | 5.1 | 42556 |

**Figure S1.** Maximum likelihood phylogeny of sixty-three, ESBL-producing *E. coli* ST131 isolates and their genetic characteristic, including virulome and virotype. **Legend:** Rectangles of different colors indicate clusters in the phylogenetic tree and the star symbol indicates bootstrap values (LRT: > 0.8 and UF bootstrap > 0.95). Hybrid genome assembly is indicated by yellow background. In the table, the cells indicate the absence (grey) or presence of certain virulence genes (red). The features show the profile of C1-M27 and C2/H30Rx isolates by year of isolation, health care institution and virotypes

**Figure S2.** The results of phylogenetic reconstruction and fastBAPS clustering using the core genome alignment prepared by Panaroo. **Legend:** The results of phylogenetic reconstruction and fastBAPS clustering using the core genome alignment prepared by Panaroo. The left panel shows the Maximum Likelihood (ML) phylogenetic tree reconstructed by IQtree and midpoint rooted with phangorn. Branch lengths on the phylogram are proportional to the pairwise genetic divergence of isolates. The right panel shows the clusters of isolates identified using fastBAPS. All columns represent different clusters and the fields in blue in the different columns indicate the classification of the isolate in the corresponding cluster.
